# Supplementary material
Source: publisher figshare collection journal article supplement (https://diabetesjournals.figshare.com/articles/dataset/_/16593023)
Supplement: Supplementary file 1 [file 1]

# MetGen Plus investigators (Updated September 2021)

| First Name | Surname         | Initials | Affiliation                                                                                                                                                                                                                                                                                                                                                                                                     |
|------------|-----------------|----------|-----------------------------------------------------------------------------------------------------------------------------------------------------------------------------------------------------------------------------------------------------------------------------------------------------------------------------------------------------------------------------------------------------------------|
| Ewan       | Pearson         | E.R.     | Division of Population Health and Genomics, Ninewells Hospital and Medical School, University of Dundee, Dundee, Scotland, United Kingdom, DD1 9SY                                                                                                                                                                                                                                                              |
| Adem       | Dawed           | A.Y.     | Division of Population Health and Genomics, Ninewells Hospital and Medical School, University of Dundee, Dundee, Scotland, United Kingdom, DD1 9SY                                                                                                                                                                                                                                                              |
| Kaixin     | Zhou            | K.       | Division of Population Health and Genomics, Ninewells Hospital and Medical School, University of Dundee, Dundee, Scotland, United Kingdom, DD1 9SY                                                                                                                                                                                                                                                              |
| Rury       | Holman          | R.R.     | Diabetes Trials Unit, Radcliffe Department of Medicine, University of Oxford, United Kingdom                                                                                                                                                                                                                                                                                                                    |
| Ruth       | Coleman         | R.L.     | Diabetes Trials Unit, Radcliffe Department of Medicine, University of Oxford, United Kingdom                                                                                                                                                                                                                                                                                                                    |
| Leen       | 't Hart         | L.M.     | Department of Cell and Chemical Biology, Leiden University Medical Center, Leiden, The Netherlands; Department of Biomedical Data Sciences, Section Molecular Epidemiology, Leiden University Medical Center, Leiden, The Netherlands; Amsterdam University Medical Center, Location VUmc, Department of Epidemiology and Data Sciences, Amsterdam Public Health Research Institute, Amsterdam, The Netherlands |
| Roderick   | Slieker         | R.C.     | Department of Cell and Chemical Biology, Leiden University Medical Center, Leiden, The Netherlands                                                                                                                                                                                                                                                                                                              |
| Joline     | Beulens         | J.W.J.   | Amsterdam University Medical Center, location VUmc, Department of Epidemiology and Data Sciences, Amsterdam Public Health Research Institute, Amsterdam, The Netherlands; Julius Center for Health Sciences and Primary Care, University Medical Center Utrecht, Utrecht, The Netherlands                                                                                                                       |
| Amber      | van der Heijden | A.A.W.A. | Amsterdam University Medical Center, location VUmc, Department of General Practice and Elderly Care Medicine, Amsterdam Public Health Research Institute, Amsterdam, The Netherlands                                                                                                                                                                                                                            |
| Giel       | Nijpels         | G.       | Amsterdam University Medical Center, location VUmc, Department of General Practice and Elderly Care Medicine, Amsterdam Public Health Research Institute, Amsterdam, The Netherlands                                                                                                                                                                                                                            |
| Petra      | Elders          | P.M.     | Amsterdam University Medical Center, location VUmc, Department of General Practice and                                                                                                                                                                                                                                                                                                                          |

|           |           |      |                                                                                                                                                                                                                                                                                                                        |
|-----------|-----------|------|------------------------------------------------------------------------------------------------------------------------------------------------------------------------------------------------------------------------------------------------------------------------------------------------------------------------|
|           |           |      | Elderly Care Medicine, Amsterdam Public Health Research Institute, Amsterdam, The Netherlands                                                                                                                                                                                                                          |
| Femke     | Rutters   | F.   | Amsterdam University Medical Center, location VUmc, Department of Epidemiology and Data Sciences, Amsterdam Public Health Research Institute, Amsterdam, The Netherlands                                                                                                                                               |
| Bruno     | Stricker  | B.H. | Department of Epidemiology, Erasmus MC University Medical Center, PO Box 2040, 3000 CA Rotterdam, The Netherlands; Department of Internal Medicine, Erasmus MC University Medical Center, PO Box 2040, 3000 CA Rotterdam, The Netherlands; Inspectorate of Health Care, PO Box 2518, 6401 DA Heerlen, The Netherlands. |
| Fariba    | Ahmadizar | F.   | Department of Epidemiology, Erasmus MC University Medical Center, Rotterdam, The Netherlands                                                                                                                                                                                                                           |
| Catherine | de Keyser | C.E. | Vascular Medicine, Department of Internal Medicine, Erasmus University Medical Center, Rotterdam, The Netherlands.                                                                                                                                                                                                     |
| Adriaan   | Kooy      | A.   | Department of Internal Medicine, Care Group Treant, Location Bethesda Hoogeveen, Hoogeveen, The Netherlands.; Bethesda Diabetes Research Center, Hoogeveen, The Netherlands.; Department of Internal Medicine, University Medical Center Groningen, University of Groningen, Groningen, The Netherlands.               |
| Mattijs   | Out       | M.   | Department of Internal Medicine, Bethesda Hospital Hoogeveen - Care Group Treant, Hoogeveen, The Netherlands.; Bethesda Diabetes Research Center Hoogeveen, Hoogeveen, The Netherlands.; Department of Internal Medicine, Medisch Spectrum Twente, Enschede, The Netherlands.                                          |
| Jānis     | Kloviņš   | J.   | Latvian Biomedical Research and Study Centre, Ratsupites iela 1, Riga, 1067, Latvia.                                                                                                                                                                                                                                   |
| Linda     | Zaharenko | L.   | Latvian Biomedical Research and Study Centre, Riga, Latvia.                                                                                                                                                                                                                                                            |
| Martin    | Javorsky  | M.   | Faculty of Medicine, Department of Angiology, East Slovak Institute of Cardiovascular Diseases, Šafárik University, Košice, Slovak Republic.                                                                                                                                                                           |
| Ivan      | Tkac      | I.   | P.J. Šafárik University, Faculty of Medicine, Košice, Slovakia; L. Pasteur University Hospital, Košice, Slovakia.                                                                                                                                                                                                      |
| Jose      | Florez    | J.C. | Center for Genomic Medicine, Massachusetts General Hospital, Boston, MA, USA.; Programs in Metabolism and Medical & Population Genetics, Broad Institute of MIT and Harvard, Cambridge, MA, USA.; Diabetes Unit, Massachusetts General Hospital, Boston, MA, USA; Department of                                        |

|          |                |        |                                                                                                                                                                                                                                                                                                                                                                                                                                                                                                                    |
|----------|----------------|--------|--------------------------------------------------------------------------------------------------------------------------------------------------------------------------------------------------------------------------------------------------------------------------------------------------------------------------------------------------------------------------------------------------------------------------------------------------------------------------------------------------------------------|
|          |                |        | Medicine, Harvard Medical School, Boston, MA, USA.                                                                                                                                                                                                                                                                                                                                                                                                                                                                 |
| Kathy    | Giacomini      | K.M.   | Department of Bioengineering and Therapeutic Sciences, University of California San Francisco, San Francisco, CA                                                                                                                                                                                                                                                                                                                                                                                                   |
| Sook Wah | Yee            | S.W.   | Department of Bioengineering and Therapeutic Sciences, University of California San Francisco, San Francisco, CA                                                                                                                                                                                                                                                                                                                                                                                                   |
| Monique  | Hedderson      | M.     | Division of Research Kaiser Permanente Northern California, Oakland, CA, United States of America.                                                                                                                                                                                                                                                                                                                                                                                                                 |
| Michiaki | Kubo           | M.     | Center for Integrative Medical Sciences, RIKEN, 1-7-22 Suehiro-cho, Tsurumi-ku, Yokohama, Kanagawa, 230-0045, Japan.                                                                                                                                                                                                                                                                                                                                                                                               |
| Alison   | Motsinger-Reif | A.A.   | Bioinformatics Research Center, North Carolina State University, Raleigh, NC 27607, USA; Department of Statistics, North Carolina State University, Raleigh, NC 27607, USA.                                                                                                                                                                                                                                                                                                                                        |
| Michael  | Wagner         | M.J.   | Department of Chemistry, The George Washington University, Washington, District of Columbia 20052, United States.                                                                                                                                                                                                                                                                                                                                                                                                  |
| Sabina   | Semiz          | S.     | Department of Biochemistry and Clinical Analysis, Faculty of Pharmacy, University of Sarajevo, Sarajevo, Bosnia and Herzegovina.                                                                                                                                                                                                                                                                                                                                                                                   |
| Tanja    | Dujic          | T.     | Department of Biochemistry and Clinical Analysis, Faculty of Pharmacy, University of Sarajevo, Sarajevo, Bosnia and Herzegovina                                                                                                                                                                                                                                                                                                                                                                                    |
| Mette    | Christensen    | M.M.   | Department of Clinical Biochemistry and Pharmacology, Odense University Hospital, Odense, Denmark.                                                                                                                                                                                                                                                                                                                                                                                                                 |
| Kim      | Brøsen         | K.     | Department of Public Health, Clinical Pharmacology, Pharmacy and Environmental Health, University of Southern Denmark, Odense, Denmark.                                                                                                                                                                                                                                                                                                                                                                            |
| Dawn     | Waterworth     | D.M.   | Genetics, PCPS, GlaxoSmithKline, Philadelphia, PA 19104, USA.                                                                                                                                                                                                                                                                                                                                                                                                                                                      |
| Meg      | Ehm            | M.G.   | GlaxoSmithKline, Quantitative Sciences, Research Triangle Park, NC, USA.                                                                                                                                                                                                                                                                                                                                                                                                                                           |
| Ronald   | Ma             | R.C.W. | Department of Medicine and Therapeutics, Prince of Wales Hospital, The Chinese University of Hong Kong, Hong Kong, China; Hong Kong Institute of Diabetes and Obesity, The Chinese University of Hong Kong, Hong Kong, China; Li Ka Shing Institute of Health Sciences, The Chinese University of Hong Kong, Hong Kong, China; Chinese University of Hong Kong-Shanghai Jiao Tong University Joint Research Centre in Diabetes Genomics and Precision Medicine, Chinese University of Hong Kong, Hong Kong, China. |

|       |       |      |                                                                                                                                                                                                                                                                                                                                          |
|-------|-------|------|------------------------------------------------------------------------------------------------------------------------------------------------------------------------------------------------------------------------------------------------------------------------------------------------------------------------------------------|
| Bruce | Psaty | B.M. | Cardiovascular Health Research Unit, University of Washington, Seattle, WA, USA.; Department of Epidemiology, University of Washington, Seattle, WA, USA.; Group Health Research Institute, Group Health Cooperative, Seattle, WA, USA. 4. Department of Medicine, University of Washington, Seattle, WA, USA.                           |
| James | Floyd | J.S. | Department of Medicine, University of Washington, Seattle, WA, USA.; Department of Epidemiology, University of Washington, Seattle, WA, USA.; Cardiovascular Health Research Unit, University of Washington, Seattle, WA, USA. 4. Kaiser Permanente Washington Health Research Institute, Kaiser Permanente Washington, Seattle, WA, USA |
