# Supplementary material
Source: publisher figshare collection journal article supplement (https://diabetesjournals.figshare.com/articles/dataset/_/16593023)
Supplement: Supplementary file 2 [file 1]

## Supplementary notes

### Cohort descriptions:

**GoDARTS:** GoDARTS is a longitudinal cohort study established to study the genetics of T2D. Over 18,000 participants were enrolled between December 1998 and August 2012, of whom half of them are diagnosed with T2D and the remaining age and sex matched non-diabetic controls identified from general practice records in Tayside, Scotland<sup>1</sup>. Comprehensive electronic medical records history dating back to 1990 including anthropometric, clinical, prescription and biochemistry is available for each participant through a unique anonymised community health index number provided by the Health Informatics Centre (HIC) in partnership with the University of Dundee and the National Health Service (NHS). Previous analysis from the GoDARTS has delivered crucial PGx findings in diabetes and related traits<sup>2-10</sup>. The GODARTS study was approved by the Tayside Committee for Medical Research Ethics and written, informed consent was obtained from each participant. In this study, participants diagnosed with type 2 diabetes with sulfonylurea prescription as monotherapy or add on to metformin were included. Subjects with a history of insulin use, diagnosed before 35 years of age and baseline HbA1c <7% or >14 % were removed.

**PMET1:** Pharmacogenomics of Metformin (PMET) cohort 1, was established to study the metformin response of patients with T2D. The participants from the PMET1 cohort were selected from the Genetic Epidemiology Research on Adult Health and Aging (GERA) cohort, a subsample of the Kaiser Permanente Research Program on Genes, Environment, and Health (RPEGH). The criteria for selecting the participants from GERA cohort have been described previously<sup>11-13</sup>. A detailed description of the cohort and study design can also be found in dbGAP (dbGaP Study Accession: phs000674.v1.p1). Genotyping of the European ancestry was performed using the methods described previously<sup>14-16</sup>. The cohort was imputed using IMPUTE2 and 1000 Genome Phase I. This cohort was used as replication cohort for two metformin pharmacogenomics studies<sup>10,17</sup>. In this genome-wide meta-analysis of sulfonylurea response, prescriptions of sulfonylurea added to initial metformin therapy, along with HbA1c levels, dose and adherence were available for genetic association studies.

**PMET2:** Pharmacogenomics of Metformin (PMET) cohort 2, was established to study the metformin response of patients with T2D. The participants from the PMET2 cohort were selected from the Kaiser Permanente Research Program on Genes, Environment, and Health (RPEGH), using the criteria previously established for PMET1. It was established using the research funding from the US National Institute of Health (NIH) grant (R01-GM117163). In this genome-wide meta-analysis of sulfonylurea response, prescriptions of sulfonylurea added to initial metformin therapy, along with HbA1c levels, dose and adherence were available for genetic association studies. Genotypes for PMET2 were imputed to HRC.r1-1 EUR reference genome (GRCh37 build) using the Michigan Imputation Server.

**DCS:** The DCS is a population based observational study from the West-Friesland region in the Netherlands established with the aim to improve diabetes care through empowerment and education. Details of the DCS is described elsewhere<sup>18</sup>. Patients visit their local DCS centre annually and longitudinal prescribing, biochemistry and health data are available for more than 6,000 T2D subjects of Caucasian ancestry. Each participant has consented to participate in the study and Ethical approval was obtained from the Medical Ethics Committee of the VU Vrije Universiteit Medical Center. For this study, participants diagnosed with type 2 diabetes with sulfonylurea prescription as monotherapy or add on to metformin, HbA1c levels, dose and GWAS data available were included.

**Geisinger:** Geisinger MyCode Community Health Initiative (MyCode®) is a system-wide research biorepository at Geisinger with more than 265,000 participants enrolled to date. Participants are consented to use their de-identified genetic and EHR data for research purposes.<sup>19,20</sup> The type 2 diabetes cohort in this study were identified using eMERGE algorithm.<sup>21</sup> Data extracted from EHR database included sulfonylureas, HbA1c tests, demographics, vitals. Genotyping was performed on the Illumina Infinium OmniExpress Exome array and GSA-24v1-0 array. Genotypes for both array were imputed to HRC.r1-1 EUR reference genome (GRCh37 build) separately using the Michigan Imputation Server. Only samples with European ancestry were included in the imputation. Centralized quality controls steps were performed<sup>22</sup> to only include variants with an info score > 0.7, call rate > 99% and minor allele frequency > 1% and samples with missingness <5%. This study was exempted by the Geisinger Institutional Review Board for using deidentified data and was approved by MyCode Governing Board for performing genetic study.

**METRO:** Metformin Response (METRO) cohort was established through funding by GSK (GlaxoSmithKline) in collaboration with University of California San Francisco (UCSF), and Kaiser Permanente Northern California (KPNC) under a collaborative research agreement. The goal of the cohort is to perform a genome-wide association of approximately 1000 extreme responders to metformin. The patients from Kaiser Permanente

Northern California (KPNC), who met the study criteria (see <https://www.gsk-studyregister.com/en/trial-details/?id=207926>) were invited to participate. All participants provided blood samples for GWAS genotyping. Drug response information was extracted from the electronic health record. Prescriptions of sulfonylurea added to initial metformin therapy, along with HbA1c levels, dose and adherence were available for the study.

**HARMONY:** The HARMONY trials are randomized, double-blind, placebo controlled, multicentre, phase III studies that evaluated the efficacy and safety of a s.c. injection of Albiglutide as compared with placebo or other hypoglycaemic agents in patients with type 2 diabetes. These studies were conducted in accordance with the International Conference on Harmonisation Good Clinical Practice guidelines and the Declaration of Helsinki, and all patients provided written informed consent before they participated in the study. Subjects randomised to the glimepiride arm of the HARMONY 3 trial (ClinicalTrials.gov registration number NCT00838903) were included for this study<sup>23</sup>.

**SUGAR-MGH:** The Study to Understand the Genetics of the Acute Response to Metformin and Glipizide in Humans (SUGAR-MGH) is a human perturbation study that enrolled 1,000 subjects who were naïve to type 2 diabetes medications. The study design of SUGAR-MGH has been previously described.<sup>24</sup> Briefly, participants received a single dose of 5 mg glipizide, followed by a two-day course of 500 mg metformin twice daily and a 75-g oral glucose tolerance test one week later. For the glipizide challenge, glucose and insulin levels were subsequently measured at 30, 60, 90, 120, 180, and 240 minutes to construct phenotypes of acute glipizide response. In SUGAR-MGH, 890 subjects underwent genome-wide genotyping using the Illumina Multi-Ethnic Genotyping Array, and high-quality imputation was performed using the TOPMed reference panel. Informed consent was obtained from study participants, and the study protocol was approved by the Partners Human Research Committee (Partners HealthCare, Boston, MA). For the association of rs1234032 and rs10770791 with glipizide response, the covariates were baseline glucose, age, sex, and the first 10 ancestry principal components.

## **Supplementary Tables:**

**Supplementary Table 1: List of abbreviations**

| <b>Abbreviation</b> | <b>Explanation</b>                                                                          |
|---------------------|---------------------------------------------------------------------------------------------|
| µg                  | Microgram                                                                                   |
| µM                  | Micrometre                                                                                  |
| BMI                 | Body mass index                                                                             |
| CEU population      | Northern and Western European Ancestry in Utah                                              |
| Cis-eQTL            | Cis-expression quantitative trait locus                                                     |
| DCS                 | The Hoorn Diabetes Care System                                                              |
| DIRECT              | DIabetes REsearCh on patient strATification                                                 |
| DPP4                | Dipeptidyl-peptidase 4                                                                      |
| EV                  | Empty vector                                                                                |
| GoDARTS             | Diabetes Audit and Research in Tayside Scotland                                             |
| GRCh37              | Genome Reference Consortium 37                                                              |
| GTE <sub>x</sub>    | Genotype-Tissue Expression                                                                  |
| GWAMA               | Genome-Wide Association Meta-Analysis                                                       |
| GWAS                | Genome-wide association study                                                               |
| GXYLT1              | Glucoside Xylosyltransferase 1                                                              |
| h <sup>2</sup>      | Heritability estimate                                                                       |
| HbA1c               | Glycated haemoglobin                                                                        |
| HEK293 cells        | Human embryonic kidney 293 cells                                                            |
| IC50                | Half-maximal inhibitory concentration                                                       |
| LD                  | Linkage disequilibrium                                                                      |
| LDAK                | Learning Disabilities Association of Kansas                                                 |
| MAF                 | Minor allele frequency                                                                      |
| MetGen Plus         | Metformin Genetics Plus                                                                     |
| MHC                 | Major histocompatibility complex                                                            |
| mL                  | Millilitre                                                                                  |
| mmol/mol            | Millimoles per mole                                                                         |
| mRNA                | Messenger ribonucleic acid                                                                  |
| NAS                 | Notch1 antisense transgenic                                                                 |
| NOTCH1              | Notch homolog 1, translocation-associated                                                   |
| OATP1B1             | Solute carrier organic anion transporter family member 1B1                                  |
| phet                | Heterogeneity P value                                                                       |
| PMET                | Pharmacogenomics of Metformin                                                               |
| REML                | Restricted maximum likelihood                                                               |
| SLCO1B1             | Solute Carrier Organic Anion Transporter Family Member 1B1                                  |
| SLCO1B3             | Solute Carrier Organic Anion Transporter Family Member 1B3                                  |
| SNP                 | Single-nucleotide polymorphism                                                              |
| SUGAR-MGH           | Study to understand the genetics of the acute response to metformin and glipizide in humans |
| UK                  | United Kingdom                                                                              |

**Supplementary Table 2: Baseline characteristics of participants included in each cohort**

| Characteristics               | GoDARTS 1        | GoDARTS 2        | DCS              | PMET 1                                                                         | PMET 2                                                   | METRO                                                                 | GEISINGER                                                                                                 | HARMONY        |
|-------------------------------|------------------|------------------|------------------|--------------------------------------------------------------------------------|----------------------------------------------------------|-----------------------------------------------------------------------|-----------------------------------------------------------------------------------------------------------|----------------|
| n                             | 1187             | 1118             | 600              | 835                                                                            | 417                                                      | 434                                                                   | 675                                                                                                       | 219            |
| Age at diagnosis (years)      | 58.79 ± 9.65     | 59.63 ± 10.98    | 59.18 ± 10.26    | 58.73±9.39                                                                     | 58.56±9.57                                               | 54.36±9.30                                                            | 57.31 ± 12.87                                                                                             | 55.3 ± 9.87    |
| Duration of diabetes* (years) | 4.63 [1.24-6.96] | 4.05 [1.32-7.00] | 2.76 [0.34-5.69] | NA                                                                             | NA                                                       | NA                                                                    | NA                                                                                                        | 4.90 [2.8-8.4] |
| Baseline HbA1c (%)            | 9.03 ± 1.48      | 8.92 ± 1.46      | 7.49± 1.42       | 8.25±1.56                                                                      | 8.41±1.63                                                | 8.28±1.14                                                             | 8.13±1.45                                                                                                 | 8.12 ± 0.87    |
| Weight (kg)                   | 84.09 ± 16.36    | 86.05 ± 17.16    | 88.27± 16.60     | 99.98±22.25 (N=431)                                                            | 98.19±19.34 (N=213)                                      | 105.95±20.91 (N=302)                                                  | 101.89 ± 23.10 (N=674)                                                                                    | 93.07 ± 21.18  |
| BMI (kg/m <sup>2</sup> )      | 30.36 ± 5.33     | 30.52 ± 5.53     | 29.98± 5.31      | 33.87±7.13 (N=431)                                                             | 33.59±6.57 (N=213)                                       | 34.96±7.11                                                            | 36.00 ± 7.31 (N = 674)                                                                                    | 32.43 ± 5.44   |
| Sex (women/% women)           | 47%              | 43%              | 44%              | 45%                                                                            | 46%                                                      | 40%                                                                   | 47%                                                                                                       | 42.5%          |
| Treatment HbA1c (%)           | 7.65 ± 1.40      | 7.63 ± 1.40      | 6.78± 0.93       | 7.03±1.04                                                                      | 6.99±1.08                                                | 7.45±1.18                                                             | 6.85±0.93                                                                                                 | 7.32 ± 1.08    |
| HbA1c reduction (%)           | 1.38 ± 1.71      | 1.29 ± 1.67      | 0.72± 1.41       | 1.22±1.67                                                                      | 1.42±1.84                                                | 0.83±1.35                                                             | 1.28±1.36                                                                                                 | 0.80 ± 0.95    |
| Adherence* (%)                | 0.98 [0.77-1.0]  | 0.96 [0.77-1.0]  | NA               | 0.85 [0.78-1.0]                                                                | 1.0[0.83-1.0]                                            | NA                                                                    | 1.0 [0.83,1.0]                                                                                            |                |
| Drug group (% monotherapy)    | 41.3%            | 45.1%            | 36%              | 0%                                                                             | 0%                                                       | 0%                                                                    | 24.1%                                                                                                     | 0%             |
| Average dose (% of max. BNF)* | 0.25 [0.19-0.36] | 0.25 [0.17-0.34] | 0.5 [0.25-0.5]   | Glipizide = 10.36 mg [5-10.2] (N=624); Glyburide = 6.62 mg [2.66-10.0] (N=157) | Glipizide = 10.36 mg (N=363); Glyburide = 7.74 mg (N=64) | Glipizide = 5.98 mg [5-5] (N=400); Glyburide = 3.89 mg [2.5-5] (N=18) | Glipizide = 8.14 mg [6.08 - 10.0]; Glyburide = 6.33 mg [3.58 - 8.14]; Glimepiride = 2.12 mg [1.70 - 3.43] |                |

\*median [IQR]

**Supplementary Table 3: Genotyping arrays and models used in each cohort**

| <b>Cohort</b> | <b>Genotyping platform</b>                                                    | <b>Clinical covariates</b>                                                                            | <b>PubMed citation</b> |
|---------------|-------------------------------------------------------------------------------|-------------------------------------------------------------------------------------------------------|------------------------|
| GoDARTS 1     | Affymetrix Genome-Wide Human SNP array 6.0 (Affymetrix, Santa Clara, CA, USA) | Baseline HbA1c, age at diagnosis, baseline BMI, sex, daily dose, adherence, drug group, 3PCs          | 29025058               |
| GoDARTS 2     | Illumina HumanOminExpress                                                     | Baseline HbA1c, age at diagnosis, baseline BMI, sex, daily dose, adherence, drug group, 3PCs          | 29025058               |
| DCS           | Illumina HumanCoreExpress BeadChip                                            | Baseline HbA1c, age at diagnosis, baseline BMI, sex, daily dose, adherence, 3PCs                      | 25287012,<br>21447662  |
| PMET 1        | Affymetrix Axiom genotyping technology                                        | Baseline HbA1c, daily dose, adherence, days to treatment HbA1c, 4PCs                                  | 21565264,<br>27500523  |
| PMET 2        | Illumina OmniExpressExome                                                     | Baseline HbA1c, daily dose, adherence, days to treatment HbA1c, 4PCs                                  | None                   |
| METRO         | Illumina HumanOminExpress                                                     | Baseline HbA1c, daily dose, days to treatment HbA1c, 4PCs                                             | None                   |
| GEISINGER     | Illumina Infinium OmniExpress Exome array (N=542) and GSA-24v1-0 (N=133)      | Baseline HbA1c, age at diagnosis, sex, chip, drug group, baseline BMI, days to treatment HbA1c, 5PCs. | None                   |
| HARMONY       | Illumina                                                                      | Baseline HbA1c, age at diagnosis, baseline BMI, sex, daily dose, adherence, drug group, 3PCs          | 24898304               |

**Supplementary Table 4: Linear regression model for HbA1c reduction to SU treatment in the GoDARTS and PMET data.**

| <b>GoDARTS (2,314)</b>  |             |           |                        |
|-------------------------|-------------|-----------|------------------------|
| <b>Variable</b>         | <b>beta</b> | <b>se</b> | <b>p</b>               |
| Statin use              | 0.22        | 0.09      | 0.02                   |
| rs10770791C             | 0.24        | 0.06      | $1.66 \times 10^{-05}$ |
| rs1234032C              | -0.25       | 0.08      | 0.003                  |
| Baseline HbA1c          | 0.75        | 0.02      | $<2 \times 10^{-16}$   |
| Sex                     | 0.32        | 0.06      | $1.31 \times 10^{-08}$ |
| Age at diagnosis        | 0.02        | 0.003     | $1.13 \times 10^{-07}$ |
| BMI                     | -0.01       | 0.005     | 0.07                   |
| Dose                    | -0.13       | 0.02      | $1.08 \times 10^{-16}$ |
| Statin use*rs10770791C  | -0.24       | 0.08      | 0.001                  |
| <b>PMET (n = 1,252)</b> |             |           |                        |
| Statin use              | -0.05       | 0.11      | 0.64                   |
| rs10770791C             | 0.21        | 0.07      | 0.005                  |
| rs1234032C              | -0.37       | 0.09      | <0.0001                |
| Baseline HbA1c          | 0.86        | 0.02      | <0.0001                |
| Statin use*rs10770791C  | -0.12       | 0.09      | 0.19                   |

Sex: male Vs Female, dose: average dose (% of max. BNF)

**Supplementary Table 5: Inhibition potencies of atorvastatin and simvastatin acid for SLCO1B1- and SLCO1B3-mediated glyburide uptake. The experiments were repeated once to obtain IC<sub>50</sub> mean +/- SD (the inhibition concentration at 50% glyburide uptake).**

| <b>Substrate</b> | <b>Inhibitor</b>    | <b>OATP1B1<br/>(IC<sub>50</sub>, μM)</b> | <b>OATP1B3<br/>(IC<sub>50</sub>, μM)</b> |
|------------------|---------------------|------------------------------------------|------------------------------------------|
| Glyburide        | Atorvastatin (acid) | 0.2 ± 0.1                                | 1.7 ± 1.3                                |
| Glyburide        | Simvastatin (acid)  | 2.9 ± 0.2                                | 2.3 ± 1.9                                |

**Supplementary Table 6: Stratified analysis by statins**

| <b>GoDARTS (n = 2,314)</b>       |             |           |                        |                                   |           |                        |
|----------------------------------|-------------|-----------|------------------------|-----------------------------------|-----------|------------------------|
| <b>SU with Statins (1,227)</b>   |             |           |                        | <b>SU without statins (1,087)</b> |           |                        |
| <b>Variable</b>                  | <b>beta</b> | <b>se</b> | <b>p</b>               | <b>beta</b>                       | <b>se</b> | <b>p</b>               |
| rs10770791C                      | 0.001       | 0.05      | 0.99                   | 0.24                              | 0.06      | $5.76 \times 10^{-05}$ |
| Baseline HbA1c                   | 0.75        | 0.03      | $<2 \times 10^{-16}$   | 0.76                              | 0.23      | $<2 \times 10^{-16}$   |
| Sex                              | 0.24        | 0.07      | $0.91 \times 10^{-04}$ | 0.40                              | 0.09      | $3.16 \times 10^{-06}$ |
| Age at diagnosis                 | 0.02        | 0.004     | $8.24 \times 10^{-05}$ | 0.02                              | 0.004     | $4.7 \times 10^{-04}$  |
| BMI                              | -0.005      | 0.007     | 0.50                   | -0.01                             | 0.008     | 0.08                   |
| Dose                             | -0.15       | 0.02      | $5.06 \times 10^{-11}$ | -0.11                             | 0.02      | $6.51 \times 10^{-06}$ |
| <b>PMET (n = 1,252)</b>          |             |           |                        |                                   |           |                        |
| <b>SU with Statins (869)</b>     |             |           |                        | <b>SU without statins (383)</b>   |           |                        |
| <b>Variable</b>                  | <b>beta</b> | <b>se</b> | <b>p</b>               | <b>beta</b>                       | <b>se</b> | <b>p</b>               |
| rs10770791C                      | 0.09        | 0.04      | 0.04                   | 0.21                              | 0.09      | 0.016                  |
| Baseline HbA1c                   | 0.84        | 0.02      | <0.0001                | 0.88                              | 0.034     | <0.0001                |
| <b>Meta-analysis (n = 3,566)</b> |             |           |                        |                                   |           |                        |
| rs10770791C                      | 0.05        | 0.03      | 0.11                   | 0.23                              | 0.05      | <0.0001                |

Sex: male Vs Female, dose: average dose (% of max. BNF)

Supplementary Figures:

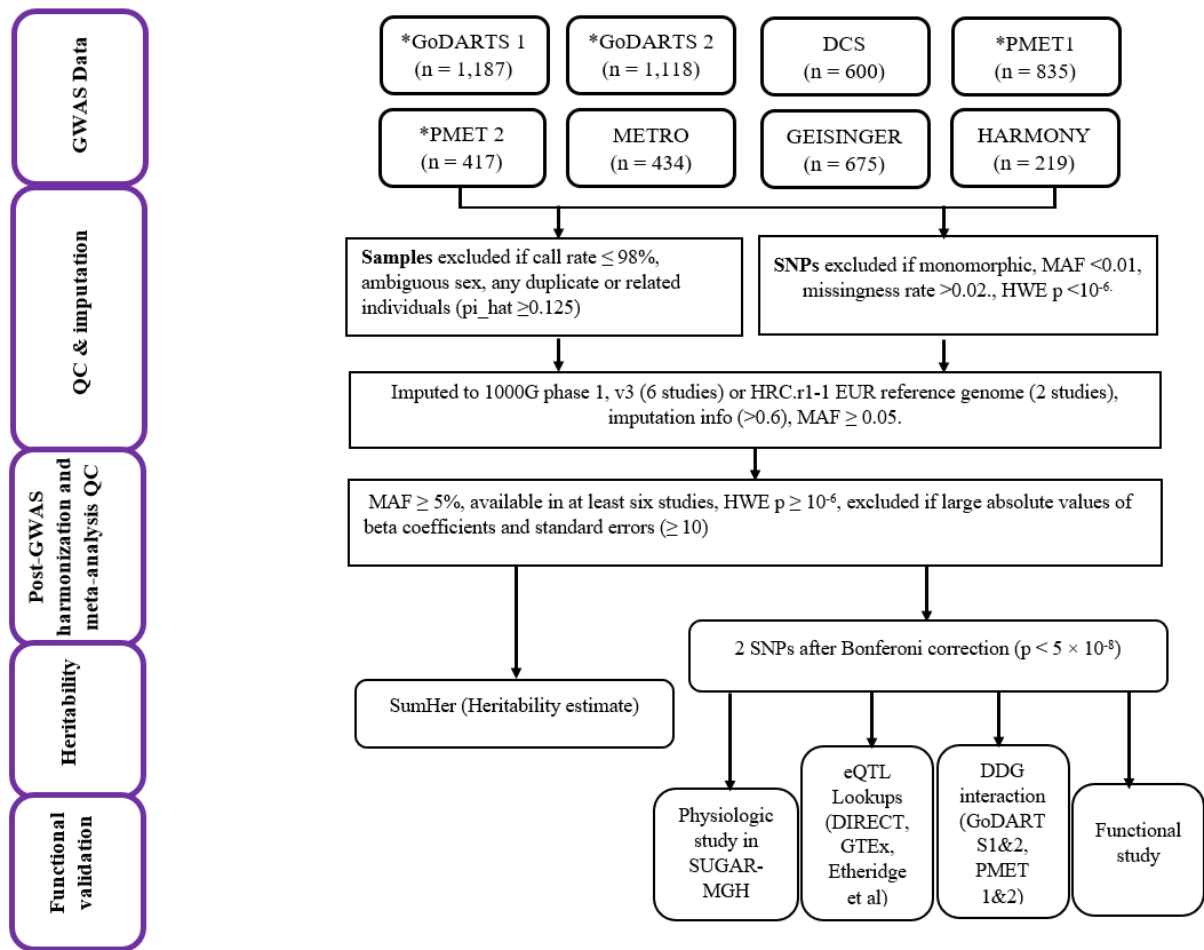

Supplementary Figure 1: A flowchart overview of the entire GWAS QC, meta-analysis and validation steps. DDG: drug-drug-gene, \*: individual genetic and prescription data is available for follow-up studies.



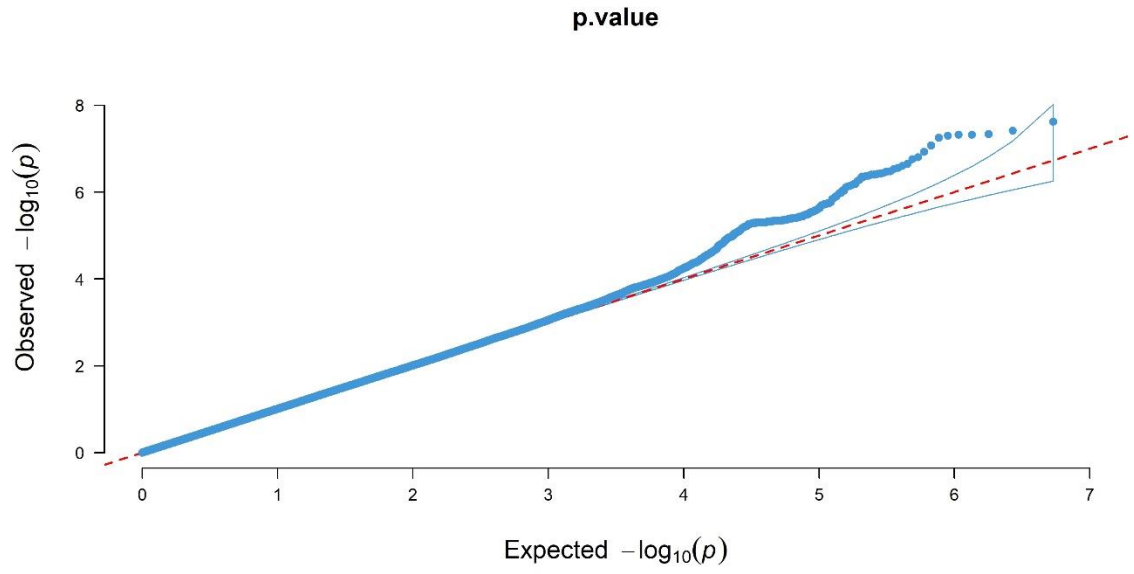

**Supplementary Figure 2: The relationship between observed and expected p values (Q-Q plot) ( $\lambda = 1.008$ ).**

## References

1. Hébert, H.L. *et al.* Cohort Profile: Genetics of Diabetes Audit and Research in Tayside Scotland (GoDARTS). *Int J Epidemiol* **47**, 380-381j (2018).
2. Dawed, A.Y. *et al.* Variation in the Plasma Membrane Monoamine Transporter (PMAT) (Encoded by SLC29A4) and Organic Cation Transporter 1 (OCT1) (Encoded by SLC22A1) and Gastrointestinal Intolerance to Metformin in Type 2 Diabetes: An IMI DIRECT Study. *Diabetes Care* **42**, 1027-1033 (2019).
3. Donnelly, L.A. *et al.* Common nonsynonymous substitutions in SLCO1B1 predispose to statin intolerance in routinely treated individuals with type 2 diabetes: a go-DARTS study. *Clin Pharmacol Ther* **89**, 210-6 (2011).
4. Dujic, T. *et al.* Association of Organic Cation Transporter 1 With Intolerance to Metformin in Type 2 Diabetes: A GoDARTS Study. *Diabetes* **64**, 1786-93 (2015).
5. Pearson, E.R. *et al.* Variation in TCF7L2 influences therapeutic response to sulfonylureas: a GoDARTS study. *Diabetes* **56**, 2178-82 (2007).
6. Postmus, I. *et al.* Pharmacogenetic meta-analysis of genome-wide association studies of LDL cholesterol response to statins. *Nat Commun* **5**, 5068 (2014).
7. Zhou, K. *et al.* Common variants near ATM are associated with glycemic response to metformin in type 2 diabetes. *Nat Genet* **43**, 117-20 (2011).
8. Zhou, K. *et al.* Loss-of-function CYP2C9 variants improve therapeutic response to sulfonylureas in type 2 diabetes: a Go-DARTS study. *Clin Pharmacol Ther* **87**, 52-6 (2010).
9. Zhou, K. *et al.* Heritability of variation in glycaemic response to metformin: a genome-wide complex trait analysis. *Lancet Diabetes Endocrinol* **2**, 481-7 (2014).
10. Zhou, K. *et al.* Variation in the glucose transporter gene SLC2A2 is associated with glycemic response to metformin. *Nat Genet* **48**, 1055-1059 (2016).
11. Choi, J.H. *et al.* A common 5'-UTR variant in MATE2-K is associated with poor response to metformin. *Clin Pharmacol Ther* **90**, 674-84 (2011).
12. Goswami, S. *et al.* Genetic variants in transcription factors are associated with the pharmacokinetics and pharmacodynamics of metformin. *Clin Pharmacol Ther* **96**, 370-9 (2014).
13. Stocker, S.L. *et al.* The effect of novel promoter variants in MATE1 and MATE2 on the pharmacokinetics and pharmacodynamics of metformin. *Clin Pharmacol Ther* **93**, 186-94 (2013).
14. Banda, Y. *et al.* Characterizing Race/Ethnicity and Genetic Ancestry for 100,000 Subjects in the Genetic Epidemiology Research on Adult Health and Aging (GERA) Cohort. *Genetics* **200**, 1285-95 (2015).
15. Hoffmann, T.J. *et al.* Next generation genome-wide association tool: design and coverage of a high-throughput European-optimized SNP array. *Genomics* **98**, 79-89 (2011).
16. Kvale, M.N. *et al.* Genotyping Informatics and Quality Control for 100,000 Subjects in the Genetic Epidemiology Research on Adult Health and Aging (GERA) Cohort. *Genetics* **200**, 1051-60 (2015).
17. Rotroff, D.M. *et al.* Genetic Variants in CPA6 and PRPF31 Are Associated With Variation in Response to Metformin in Individuals With Type 2 Diabetes. *Diabetes* **67**, 1428-1440 (2018).
18. van der Heijden, A.A. *et al.* The Hoorn Diabetes Care System (DCS) cohort. A prospective cohort of persons with type 2 diabetes treated in primary care in the Netherlands. *BMJ Open* **7**, e015599 (2017).
19. Carey, D.J. *et al.* The Geisinger MyCode community health initiative: an electronic health record-linked biobank for precision medicine research. *Genet Med* **18**, 906-13 (2016).
20. Dewey, F.E. *et al.* Distribution and clinical impact of functional variants in 50,726 whole-exome sequences from the DiscovEHR study. *Science* **354**(2016).
21. Newton, K.M. *et al.* Validation of electronic medical record-based phenotyping algorithms: results and lessons learned from the eMERGE network. *J Am Med Inform Assoc* **20**, e147-54 (2013).
22. Zhang, Y. *et al.* Dissecting genetic factors affecting phenylephrine infusion rates during anesthesia: a genome-wide association study employing EHR data. *BMC Med* **17**, 168 (2019).
23. Ahrén, B. *et al.* HARMONY 3: 104-week randomized, double-blind, placebo- and active-controlled trial assessing the efficacy and safety of albiglutide compared with placebo, sitagliptin, and glimepiride in patients with type 2 diabetes taking metformin. *Diabetes Care* **37**, 2141-8 (2014).
24. Walford, G.A. *et al.* The study to understand the genetics of the acute response to metformin and glipizide in humans (SUGAR-MGH): design of a pharmacogenetic resource for type 2 diabetes. *PLoS One* **10**, e0121553 (2015).
